# Supplementary material for: TURAN and EVAN Mediate Pollen Tube Reception in Arabidopsis Synergids through Protein Glycosylation
Source: PubMed Central journal article supplement (PMC4412406; doi:10.1371/journal.pbio.1002139), 2015-04-28

wild type

*tun-2/TUN*

*evn-2/EVN*

*evn-3/EVN*

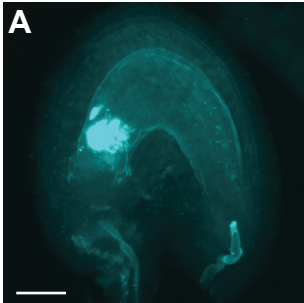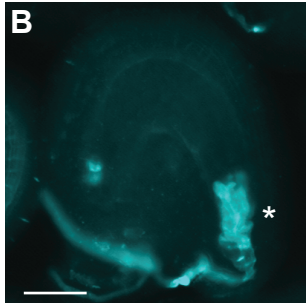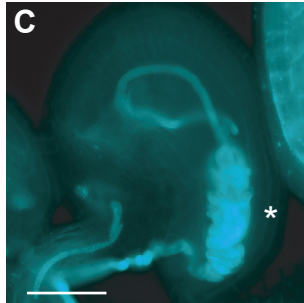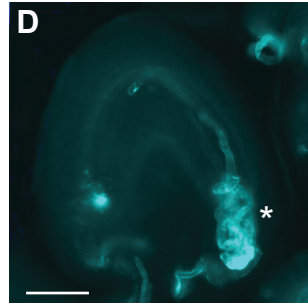

wild type

*tun-2/TUN;qrt/qrt*

*evn-2/EVN;qrt/qrt*

*evn-3/EVN;qrt/qrt*

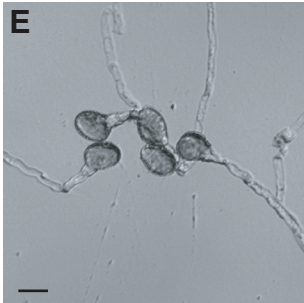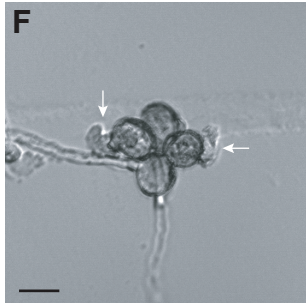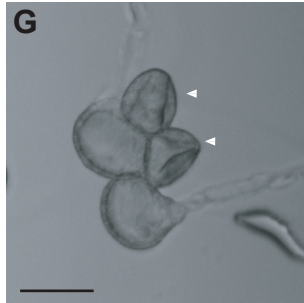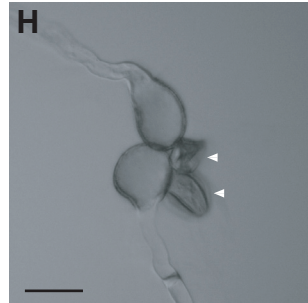

Supplement: pbio.1002139.s001.pdf [file pbio.1002139.s001.pdf]
