# Supplementary material for: TURAN and EVAN Mediate Pollen Tube Reception in Arabidopsis Synergids through Protein Glycosylation
Source: PubMed Central journal article supplement (PMC4412406; doi:10.1371/journal.pbio.1002139), 2015-04-28

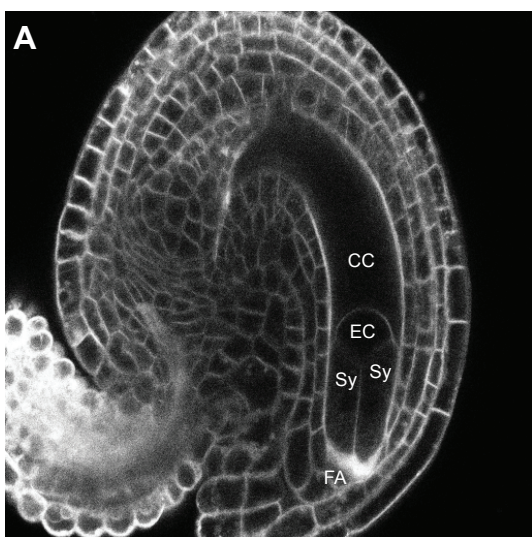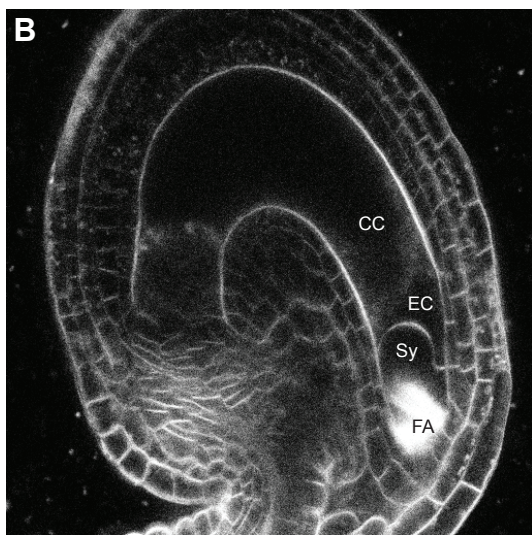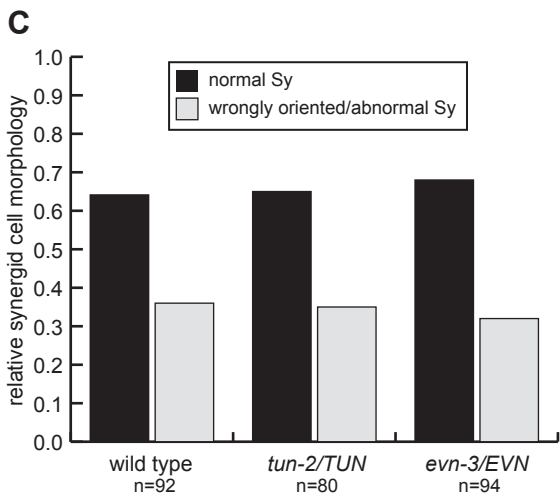

Supplement: pbio.1002139.s002.pdf [file pbio.1002139.s002.pdf]
