# Supplementary material for: TURAN and EVAN Mediate Pollen Tube Reception in Arabidopsis Synergids through Protein Glycosylation
Source: PubMed Central journal article supplement (PMC4412406; doi:10.1371/journal.pbio.1002139), 2015-04-28

*evn-2*

*tun-1*

*evn-1*

wild-type pistils

wild-type seedling  
gDNA

*PDF 1.2*

40x

*PR5*

40x

*PR1*

40x

*PAL1*

40x

*Actin11*

30x

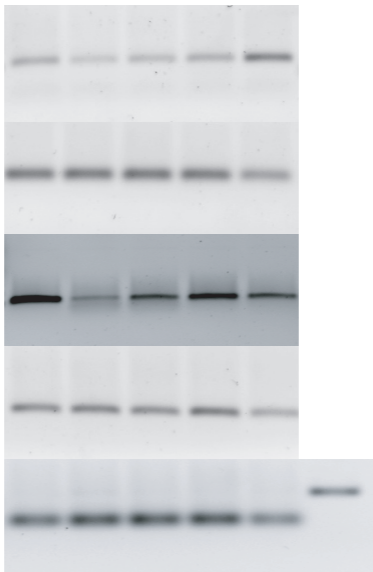

Supplement: pbio.1002139.s003.pdf [file pbio.1002139.s003.pdf]
