# Supplementary material for: TURAN and EVAN Mediate Pollen Tube Reception in Arabidopsis Synergids through Protein Glycosylation
Source: PubMed Central journal article supplement (PMC4412406; doi:10.1371/journal.pbio.1002139), 2015-04-28

*qrt/qrt*

*tun-1/TUN;qrt/qrt*

*evn-1/EVN;qrt/qrt*

**A**

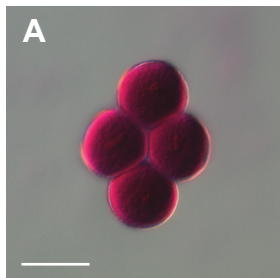

**B**

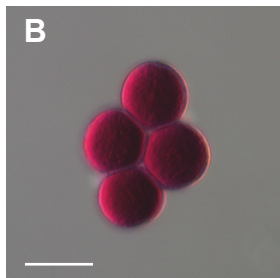

**C**

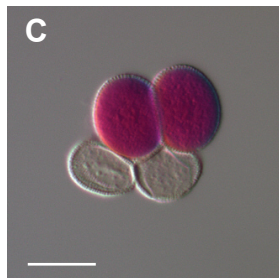

**D**

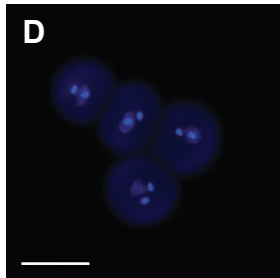

**E**

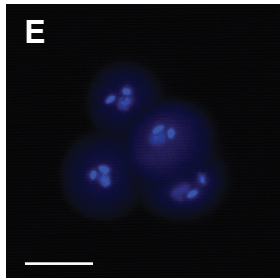

**F**

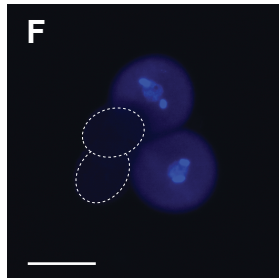

**G**

DAPI staining of different pollen stages in *evn-1/EVN;qrt/qrt*

stage 4

stage 3

stage 2

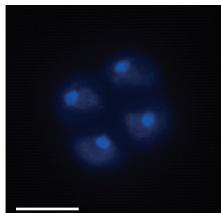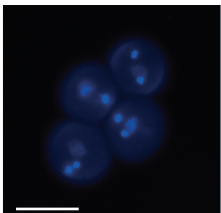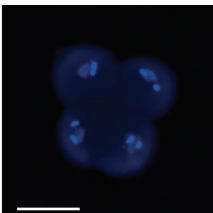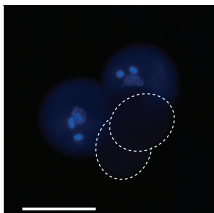

Supplement: pbio.1002139.s004.pdf [file pbio.1002139.s004.pdf]
