# Supplementary material for: TURAN and EVAN Mediate Pollen Tube Reception in Arabidopsis Synergids through Protein Glycosylation
Source: PubMed Central journal article supplement (PMC4412406; doi:10.1371/journal.pbio.1002139), 2015-04-28

Col-0 x *tun-1/TUN*

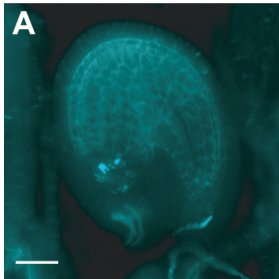

*tun-1/TUN* x Col-0

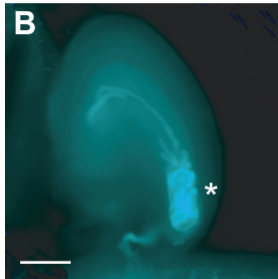

Col-0 x *evn-1/EVN*

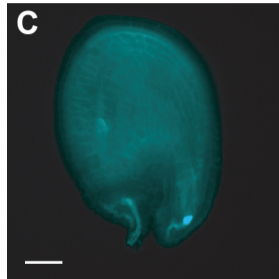

*evn-1/EVN* x Col-0

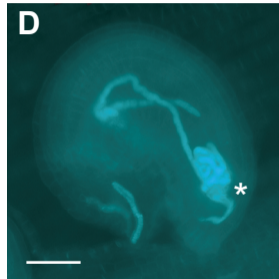

Supplement: pbio.1002139.s005.pdf [file pbio.1002139.s005.pdf]
