# Supplementary material for: TURAN and EVAN Mediate Pollen Tube Reception in Arabidopsis Synergids through Protein Glycosylation
Source: PubMed Central journal article supplement (PMC4412406; doi:10.1371/journal.pbio.1002139), 2015-04-28

**A** Surveyor assay for *AT3G45040* in the *evn-1* SRM mutant sequencing population

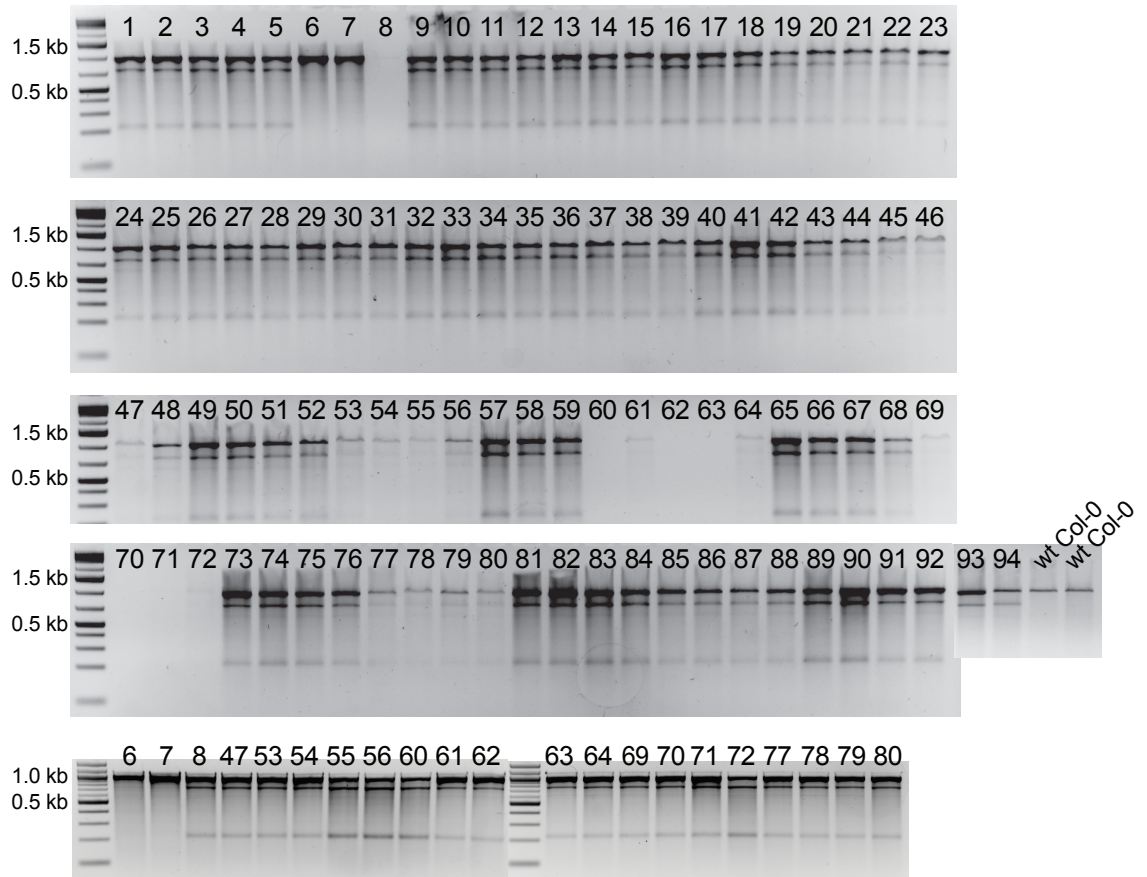

**B** Surveyor assay for *AT3G45040* in the *evn-2* SRM mutant sequencing population

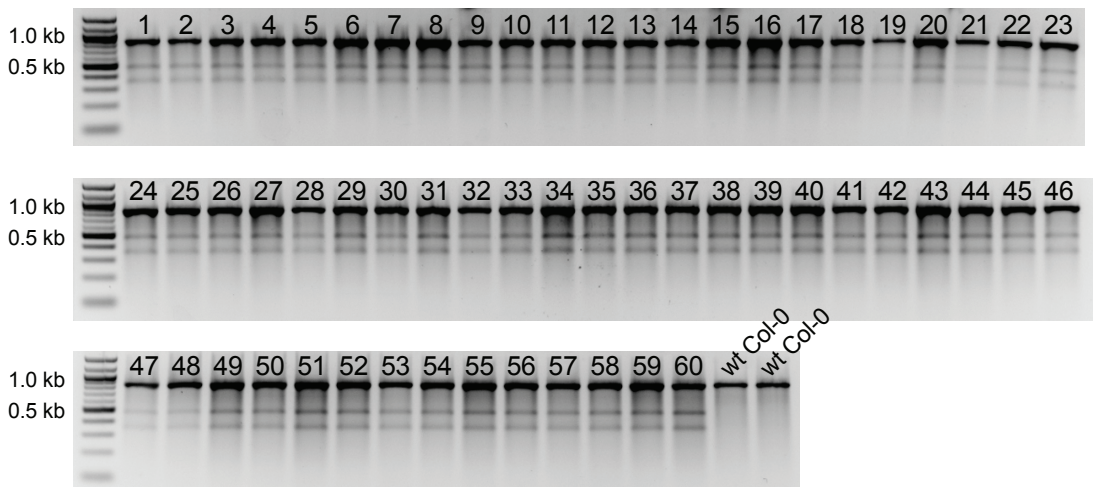

Supplement: pbio.1002139.s013.pdf [file pbio.1002139.s013.pdf]
