# Supplementary material for: TURAN and EVAN Mediate Pollen Tube Reception in Arabidopsis Synergids through Protein Glycosylation
Source: PubMed Central journal article supplement (PMC4412406; doi:10.1371/journal.pbio.1002139), 2015-04-28
Supplement: pbio.1002139.s016.pdf [file pbio.1002139.s016.pdf]

|                                       |
|---------------------------------------|
| <i>At3G56230</i> (ratio 0.43):        |
| Forward 5'-CTTGGAGCGTTATGGCGTAT-3'    |
| Reverse 5'-TGCACCACAATGCCATCTAT-3'    |
| <i>At3G59020</i> (ratio 0.47):        |
| Forward 5'-GCCATAAGCTGCACATGAGA-3'    |
| Reverse 5'-GGTTTGTGCCAAAACCTTGGT-3'   |
| <i>At3G58410</i> (ratio 0.24):        |
| Forward 5'-CTGATCAAACCAGCGATGTG-3'    |
| Reverse 5'-AAGTCACGAGGGACAAATGC-3'    |
| <i>At3G51570</i> (ratio 0.19):        |
| Forward 5'-GCTCACATTGCCTCAGCAA-3'     |
| Reverse 5'-GATTTGGTGAAGCTTTGGA-3'     |
| <i>At3G52320</i> (ratio 0.31) :       |
| Forward 5'-TGCGTGACCAGTTCTCAAAG-3'    |
| Reverse 5'-CTTGTGAGAGCCGCAACATA-3'    |
| <i>At3G55690</i> (ratio 0.54):        |
| Forward 5'-GGGCAGGAATTACGGATTTT-3'    |
| Reverse 5'-TATTTCCGGGAAGGAAAAC-3'     |
| <i>At3G52660</i> (ratio 0.16):        |
| Forward 5'-CCTCCACATGGTTCAGAGGT-3'    |
| Reverse 5'-AGCCGAAGAATCTCCTCCTC-3'    |
| <i>At3G55640</i> (ratio 0.33):        |
| Forward 5'-ACGAGGCTTCACGGATATTG-3'    |
| Reverse 5'-CAAGAAAGCAAAGGCCAAC-3'     |
| <i>At3G57290</i> (ratio 0.32):        |
| Forward 5'-GGTTTAACGGCGATGAAAAA-3'    |
| Reverse 5'-CAAGAGCGTCAGCTTTACCC-3'    |
| <i>At3G57310</i> (ratio 0.27):        |
| Forward 5'-TGATGCAGATTTATTGTTGG-3'    |
| Reverse 5'-TCTTTGAATTTCTGCAAGTCTGA-3' |
| <i>At3G43180</i> (ratio 0.16):        |
| Forward 5'-AAAGCGATGTGGGAACAAAG-3'    |
| Reverse 5'-GCTCAAGCTGTTCTCTTGC-3'     |
| <i>At3G45630</i> (ratio 0.41):        |
| Forward 5'-AACCATTTTACTGCCAAGC-3'     |
| Reverse 5'-GTTGCATGGATGGGGATAAC-3'    |
| <i>At3G45850</i> (ratio 0.37):        |
| Forward 5'-TAGCTTTCTCCCGCTCTCA-3'     |
| Reverse 5'-TTCGAAACATTCGCATGAAC-3'    |
| <i>At3G48090</i> (ratio 0.5):         |
| Forward 5'-ATCGCTGGCTTGAGAAGTGT-3'    |
| Reverse 5'-ACAAGGAAGAAGCAGGAGCA-3'    |
